# Supplementary material for: Antifungal Activity and DNA Topoisomerase Inhibition of Hydrolysable Tannins from Punica granatum L
Source: MDPI journal article supplement (doi:10.3390/ijms22084175), 2021-04-17
Supplement: s1 [file s1]

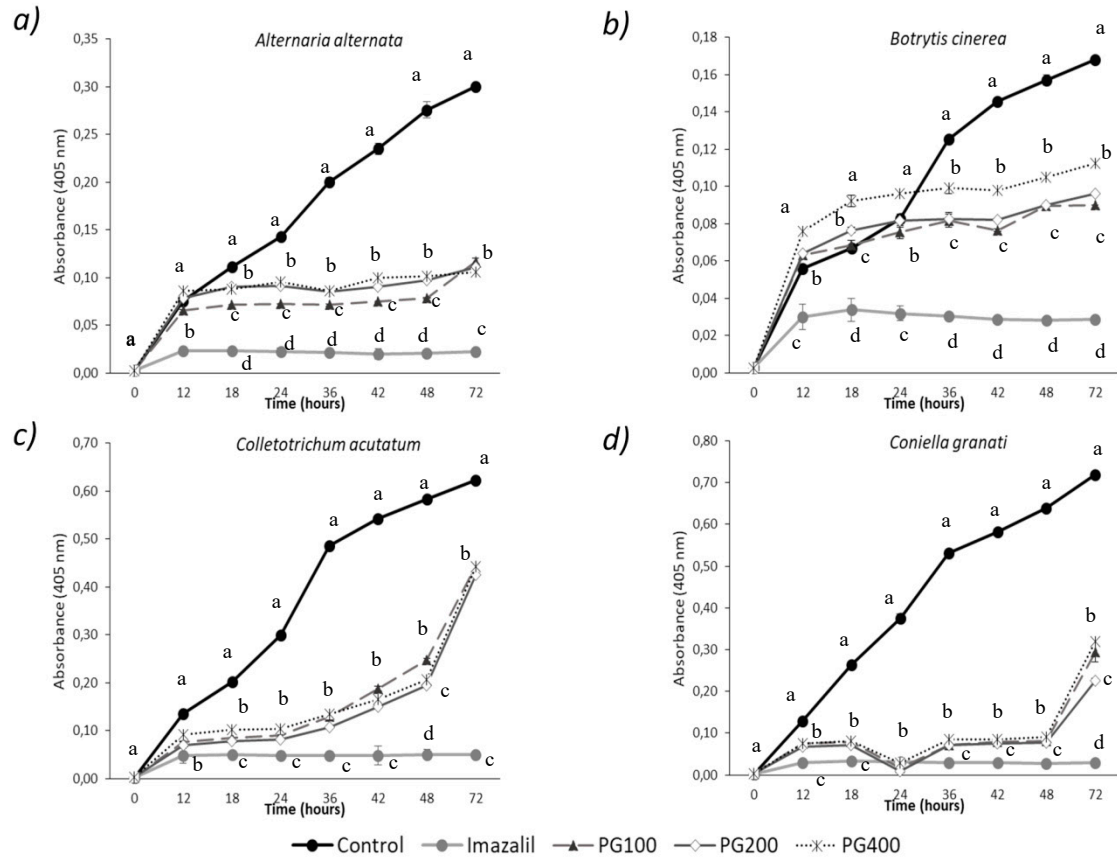

**Figure S1.** Growth of *Alternaria alternata* (panel a), *Botrytis cinerea* (panel b), *Colletotrichum acutatum sensu stricto* (s.s.) (panel c) and *Coniella granati* (panel d) for 72 h at 24 (±1) °C in the dark in presence of different concentrations of punicalagin (PG100, PG200, PG400 mg/mL). H<sub>2</sub>O and imazalil were the negative and positive control, respectively. For each pathogen and time point, results are the mean of three replicate values ± standard deviation (SD), and different letters indicate statistical significance ( $p \leq 0.05$ ), according to DMRT.

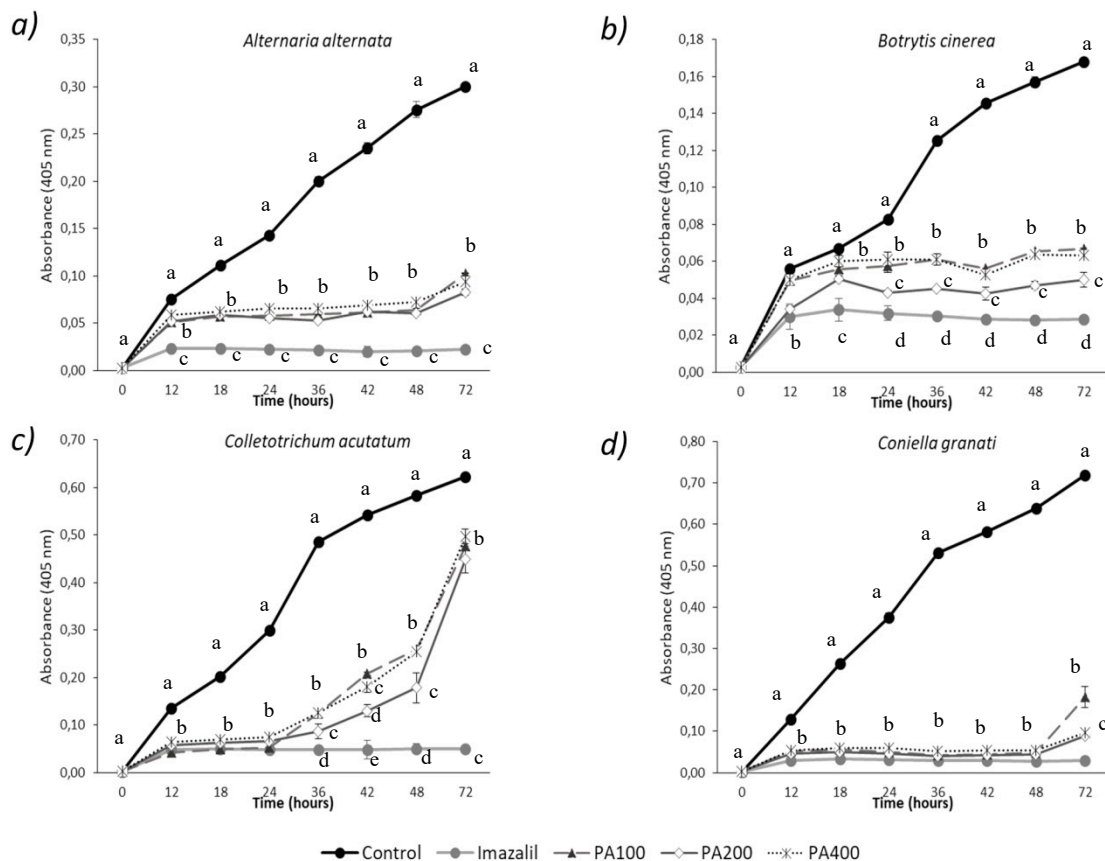

**Figure S2.** Growth of *Alternaria alternata* (**panel a**), *Botrytis cinerea* (**panel b**), *Colletotrichum acutatum sensu stricto* (s.s.) (**panel c**) and *Coniella granati* (**panel d**) for 72 h at 24 ( $\pm 1$ ) °C in the dark in presence of different concentrations of punicalin (PA100, PA200, PA400 mg/mL). H<sub>2</sub>O and imazalil were the negative and positive control, respectively. For each pathogen and time point, results are the mean of three replicate values  $\pm$  standard deviation (SD), and different letters indicate statistical significance ( $p \leq 0.05$ ) according to DMRT.

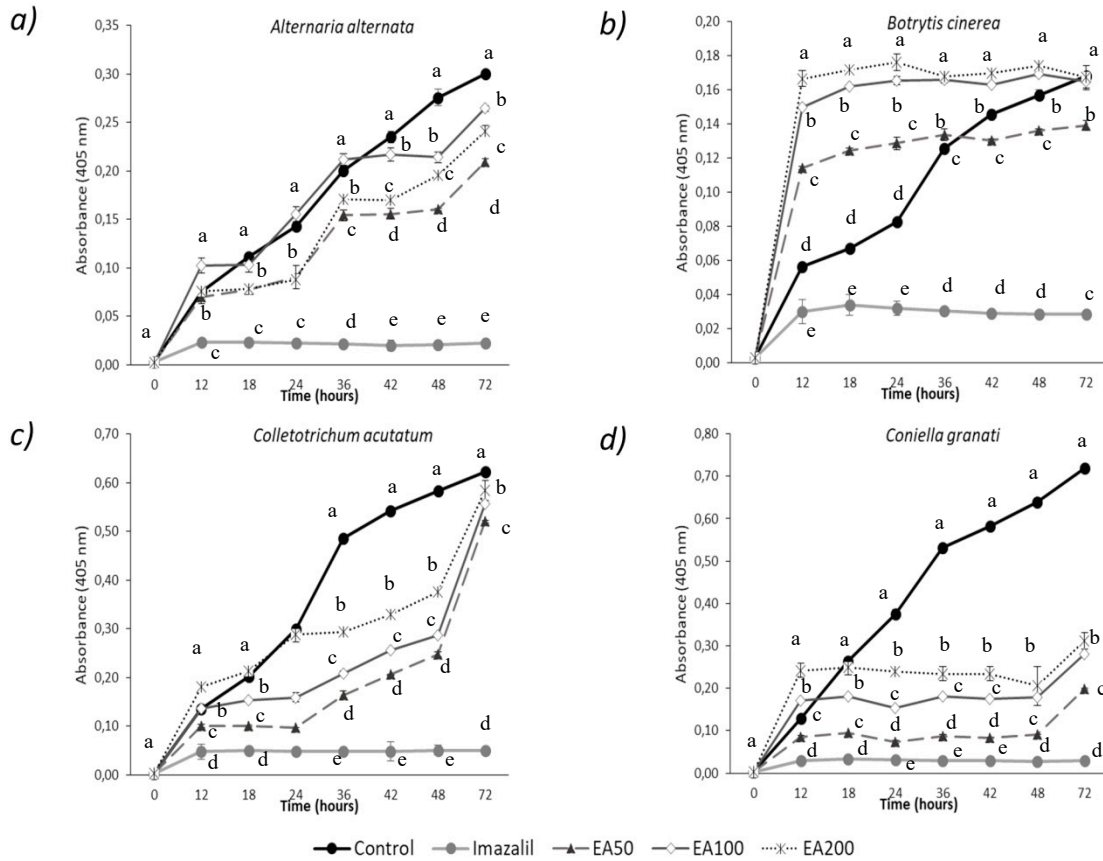

**Figure S3.** Growth of *Alternaria alternata* (**panel a**), *Botrytis cinerea* (**panel b**), *Colletotrichum acutatum sensu stricto* (s.s.) (**panel c**) and *Coniella granati* (**panel d**) for 72 h at 24 ( $\pm 1$ ) °C in the dark in presence of different concentrations of ellagic acid (EA50, EA100, EA200 mg/mL). Control (H<sub>2</sub>O) and imazalil were the negative and positive control, respectively. For each pathogen and time point, results are the mean of three replicate values  $\pm$  standard deviation (SD), and different letters indicate statistical significance ( $p \leq 0.05$ ) according to DMRT.

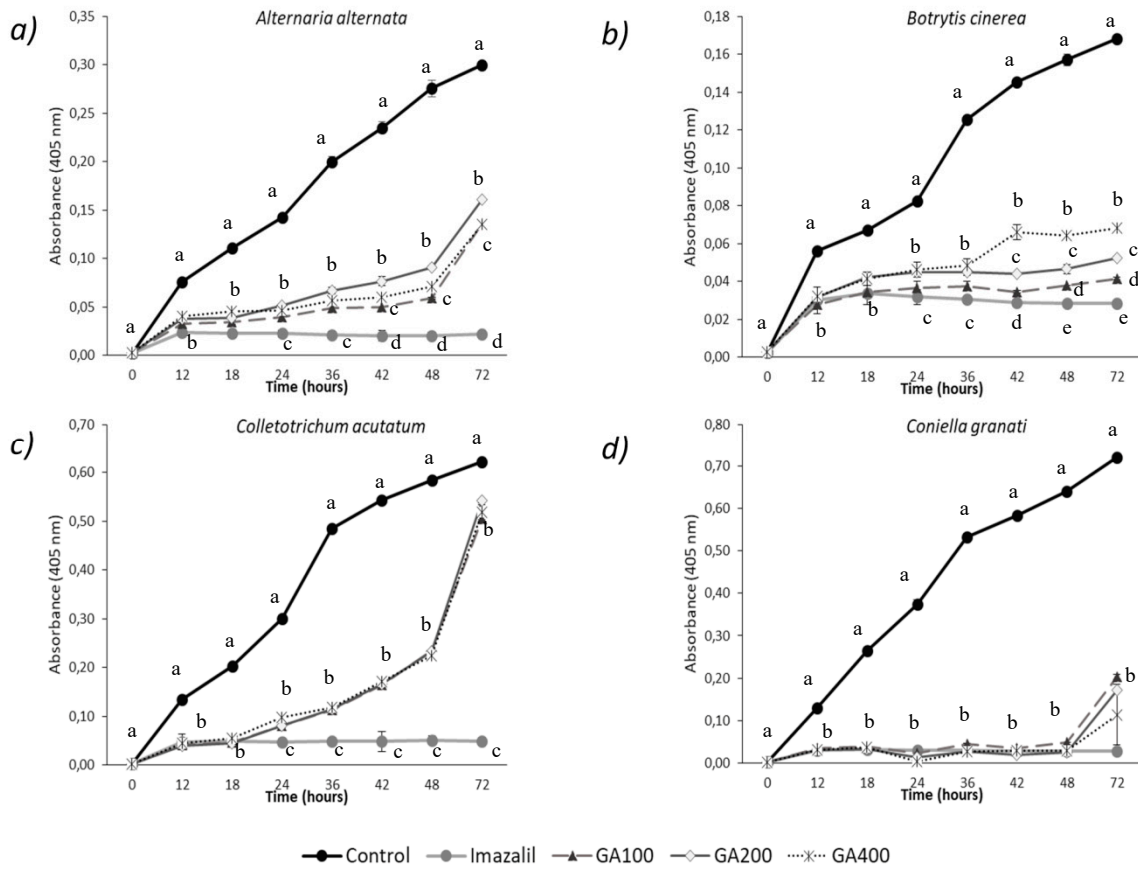

**Figure S4.** Growth of *Alternaria alternata* (panel a), *Botrytis cinerea* (panel b), *Colletotrichum acutatum sensu stricto* (s.s.) (panel c) and *Coniella granati* (panel d) for 72 h at 24 ( $\pm$  1) °C in the dark in the presence of different concentrations of gallic acid (GA100, GA200, GA400 mg/mL). H<sub>2</sub>O and imazalil were the negative and positive control, respectively. For each pathogen and time point, results are the mean of three replicate values  $\pm$  standard deviation (SD), and different letters indicate statistical significance ( $p \leq 0.05$ ) according to DMRT.

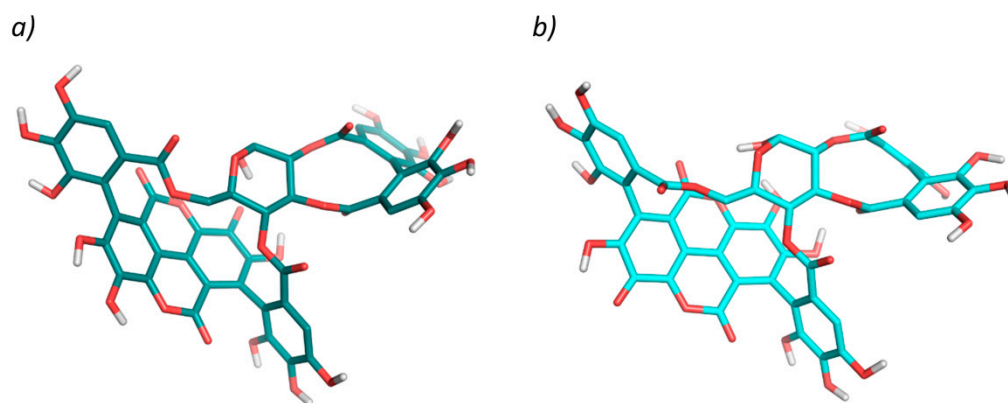

**Figure S5.** Molecular conformations considered as representative queries for punicalagin in the performed 3D ligand-based analyses. **Panels a** and **b** report the conformation of punicalagin deprotonated at the 3-hydroxyl (punicalagin 3O) and 8-hydroxyl (punicalagin 8O) groups of the ellagic acid moiety, respectively. The image was created with PyMol (The PyMOL Molecular Graphics System, Version 1.8, Schrödinger, LLC).

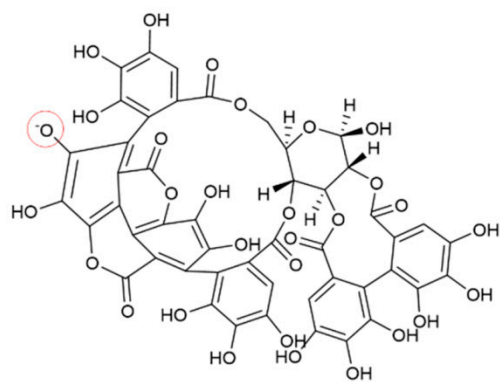

Punicalagin 30

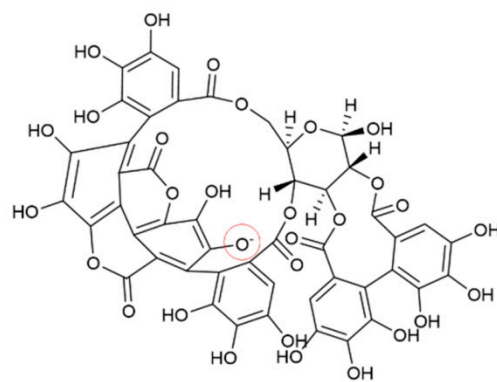

Punicalagin 80

**Figure S6.** Protonation states considered for the punicalagin natural product in the present study.
