# Supplementary material for: Antifungal Activity and DNA Topoisomerase Inhibition of Hydrolysable Tannins from Punica granatum L
Source: MDPI journal article supplement (doi:10.3390/ijms22084175), 2021-04-17
Supplement: s1 [file s1]

**Table S1**

Inhibition diameters displayed by punicalagin, punicalin, ellagic acid, gallic acid, fluconazole, amphotericin B and solvent (DMSO) in the agar disk diffusion assay. Data are expressed as mean  $\pm$  SD (mm).

|                                                       | Punicalagin     |                 |                 | Punicalin       |                 |                 | Ellagic acid    |                 |                 | Gallic acid     |                 |                 | Fluconazole     | Amphotericin B  | DMSO           |
|-------------------------------------------------------|-----------------|-----------------|-----------------|-----------------|-----------------|-----------------|-----------------|-----------------|-----------------|-----------------|-----------------|-----------------|-----------------|-----------------|----------------|
|                                                       | 50 $\mu$ g      | 100 $\mu$ g     | 250 $\mu$ g     | 50 $\mu$ g      | 100 $\mu$ g     | 250 $\mu$ g     | 12.5 $\mu$ g    | 25 $\mu$ g      | 62.5 $\mu$ g    | 50 $\mu$ g      | 100 $\mu$ g     | 250 $\mu$ g     | 25 $\mu$ g      | 25 $\mu$ g      | 20 $\mu$ L     |
| <i>Candida albicans</i> ATCC 10321                    | 19 <sup>a</sup> | 27 $\pm$ 0.2    | 35 <sup>a</sup> | 23 <sup>a</sup> | 25 $\pm$ 0.2    | 32 $\pm$ 0.1    | 18 <sup>a</sup> | 25 $\pm$ 0.3    | 32 $\pm$ 0.1    | 15 <sup>a</sup> | 21 $\pm$ 0.2    | 28 $\pm$ 0.1    | 22 $\pm$ 0.2    | 24 <sup>a</sup> | 0 <sup>a</sup> |
| <i>Candida albicans</i> SC 5314                       | 21 $\pm$ 0.3    | 25 $\pm$ 0.1    | 34 $\pm$ 0.3    | 10 $\pm$ 0.5    | 16 $\pm$ 0.5    | 23 $\pm$ 0.3    | 16 <sup>a</sup> | 27 <sup>a</sup> | 34 <sup>a</sup> | 18 $\pm$ 0.2    | 20 <sup>a</sup> | 25 <sup>a</sup> | 26 $\pm$ 0.3    | 24 $\pm$ 0.3    | 0 <sup>a</sup> |
| <i>Candida albicans</i> 1                             | 18 <sup>a</sup> | 21 <sup>a</sup> | 30 <sup>a</sup> | 15 <sup>a</sup> | 16 <sup>a</sup> | 21 <sup>a</sup> | 15 $\pm$ 0.4    | 23 <sup>a</sup> | 29 <sup>a</sup> | 14 <sup>a</sup> | 19 $\pm$ 0.1    | 24 $\pm$ 0.4    | 24 $\pm$ 0.5    | 16 $\pm$ 0.5    | 0 <sup>a</sup> |
| <i>Candida albicans</i> 2                             | 19 $\pm$ 0.3    | 21 <sup>a</sup> | 28 <sup>a</sup> | 15 $\pm$ 0.1    | 18 <sup>a</sup> | 24 $\pm$ 0.2    | 18 <sup>a</sup> | 22 <sup>a</sup> | 30 $\pm$ 0.3    | 19 <sup>a</sup> | 25 $\pm$ 0.1    | 27 <sup>a</sup> | 21 $\pm$ 0.1    | 18 $\pm$ 0.1    | 0 <sup>a</sup> |
| <i>Candida albicans</i> H                             | 20 <sup>a</sup> | 24 <sup>a</sup> | 31 <sup>a</sup> | 13 $\pm$ 0.3    | 15 $\pm$ 0.1    | 21 $\pm$ 0.6    | 15 <sup>a</sup> | 20 <sup>a</sup> | 27 <sup>a</sup> | 15 $\pm$ 0.4    | 18 <sup>a</sup> | 22 $\pm$ 0.3    | 20 $\pm$ 0.3    | 16 $\pm$ 0.1    | 0 <sup>a</sup> |
| <i>Candida albicans</i> 40                            | 15 <sup>a</sup> | 20 $\pm$ 0.4    | 30 <sup>a</sup> | 16 $\pm$ 0.3    | 16 $\pm$ 0.4    | 25 <sup>a</sup> | 17 <sup>a</sup> | 21 <sup>a</sup> | 28 $\pm$ 0.3    | 14 <sup>a</sup> | 20 $\pm$ 0.3    | 24 <sup>a</sup> | 15 $\pm$ 0.5    | 21 <sup>a</sup> | 0 <sup>a</sup> |
| <i>Candida albicans</i> 41                            | 15 <sup>a</sup> | 21 <sup>a</sup> | 30 <sup>a</sup> | 18 <sup>a</sup> | 18 <sup>a</sup> | 23 <sup>a</sup> | 18 $\pm$ 0.2    | 23 $\pm$ 0.3    | 29 $\pm$ 0.1    | 19 <sup>a</sup> | 23 <sup>a</sup> | 26 <sup>a</sup> | 14 $\pm$ 0.5    | 18 $\pm$ 0.6    | 0 <sup>a</sup> |
| <i>Candida albicans</i> 44                            | 18 <sup>a</sup> | 23 $\pm$ 0.4    | 29 $\pm$ 0.5    | 16 <sup>a</sup> | 18 <sup>a</sup> | 27 $\pm$ 0.1    | 19 <sup>a</sup> | 23 <sup>a</sup> | 32 <sup>a</sup> | 15 <sup>a</sup> | 19 $\pm$ 0.4    | 28 <sup>a</sup> | 25 $\pm$ 0.2    | 16 $\pm$ 0.2    | 0 <sup>a</sup> |
| <i>Candida parapsilosis</i>                           | 19 $\pm$ 0.4    | 21 $\pm$ 0.1    | 29 $\pm$ 0.7    | 16 $\pm$ 0.2    | 18 $\pm$ 0.4    | 23 <sup>a</sup> | 15 $\pm$ 0.5    | 19 $\pm$ 0.5    | 26 <sup>a</sup> | 15 <sup>a</sup> | 20 $\pm$ 0.2    | 23 $\pm$ 0.1    | 28 <sup>a</sup> | 21 $\pm$ 0.2    | 0 <sup>a</sup> |
| <i>Candida parapsilosis</i> 7                         | 15 <sup>a</sup> | 19 <sup>a</sup> | 28 <sup>a</sup> | 15 $\pm$ 0.1    | 16 <sup>a</sup> | 25 <sup>a</sup> | 13 <sup>a</sup> | 18 <sup>a</sup> | 25 <sup>a</sup> | 14 $\pm$ 0.1    | 19 <sup>a</sup> | 25 $\pm$ 0.4    | 25 $\pm$ 0.3    | 20 $\pm$ 0.3    | 0 <sup>a</sup> |
| <i>Candida zeylanoides</i> 33                         | 18 <sup>a</sup> | 22 $\pm$ 0.2    | 26 <sup>a</sup> | 18 $\pm$ 0.3    | 18 <sup>a</sup> | 25 <sup>a</sup> | 18 $\pm$ 0.2    | 20 <sup>a</sup> | 25 $\pm$ 0.4    | 13 <sup>a</sup> | 20 <sup>a</sup> | 24 <sup>a</sup> | 25 <sup>a</sup> | 22 <sup>a</sup> | 0 <sup>a</sup> |
| <i>Saccharomyces cerevisiae</i> 42                    | 13 <sup>a</sup> | 28 <sup>a</sup> | 32 <sup>a</sup> | 20 $\pm$ 0.5    | 20 $\pm$ 0.3    | 23 $\pm$ 0.3    | 15 <sup>a</sup> | 19 <sup>a</sup> | 23 $\pm$ 0.2    | 15 $\pm$ 0.1    | 18 $\pm$ 0.2    | 22 $\pm$ 0.1    | 30 $\pm$ 0.6    | 29 $\pm$ 0.5    | 0 <sup>a</sup> |
| <i>Aspergillus brasiliensis</i> ATCC 16404            | 15 $\pm$ 0.4    | 23 <sup>a</sup> | 28 <sup>a</sup> | 18 $\pm$ 0.3    | 21 <sup>a</sup> | 25 <sup>a</sup> | 15 $\pm$ 0.1    | 21 <sup>a</sup> | 25 <sup>a</sup> | 13 $\pm$ 0.4    | 23 <sup>a</sup> | 29 $\pm$ 0.2    | 27 <sup>a</sup> | 26 $\pm$ 0.5    | 0 <sup>a</sup> |
| <i>Aspergillus candidus</i> 3                         | 15 <sup>a</sup> | 21 <sup>a</sup> | 25 <sup>a</sup> | 15 <sup>a</sup> | 20 <sup>a</sup> | 26 <sup>a</sup> | 15 $\pm$ 0.4    | 19 $\pm$ 0.3    | 25 <sup>a</sup> | 16 $\pm$ 0.2    | 24 <sup>a</sup> | 27 <sup>a</sup> | 25 $\pm$ 0.5    | 18 $\pm$ 0.7    | 0 <sup>a</sup> |
| <i>Aspergillus candidus</i> 25                        | 18 $\pm$ 0.2    | 20 <sup>a</sup> | 28 <sup>a</sup> | 15 $\pm$ 0.4    | 18 $\pm$ 0.1    | 23 <sup>a</sup> | 13 $\pm$ 0.2    | 17 <sup>a</sup> | 21 $\pm$ 0.1    | 15 <sup>a</sup> | 23 $\pm$ 0.4    | 28 <sup>a</sup> | 27 $\pm$ 0.2    | 16 $\pm$ 0.2    | 0 <sup>a</sup> |
| <i>Cryptococcus neoformans</i> B3501                  | 15 <sup>a</sup> | 21 $\pm$ 0.1    | 28 <sup>a</sup> | 21 <sup>a</sup> | 23 $\pm$ 0.1    | 27 $\pm$ 0.4    | 17 <sup>a</sup> | 19 $\pm$ 0.1    | 24 <sup>a</sup> | 18 $\pm$ 0.5    | 25 <sup>a</sup> | 32 $\pm$ 0.1    | 37 <sup>a</sup> | 22 <sup>a</sup> | 0 <sup>a</sup> |
| <i>Cryptococcus neoformans</i> ATCC 11240             | 15 <sup>a</sup> | 18 <sup>a</sup> | 25 $\pm$ 0.3    | 18 $\pm$ 0.1    | 21 <sup>a</sup> | 25 <sup>a</sup> | 15 <sup>a</sup> | 17 $\pm$ 0.3    | 25 <sup>a</sup> | 15 <sup>a</sup> | 29 $\pm$ 0.3    | 31 $\pm$ 0.3    | 37 $\pm$ 0.3    | 24 <sup>a</sup> | 0 <sup>a</sup> |
| <i>Cryptococcus</i> 67                                | 15 $\pm$ 0.5    | 18 $\pm$ 0.4    | 28 <sup>a</sup> | 16 $\pm$ 0.3    | 18 $\pm$ 0.3    | 23 $\pm$ 0.1    | 13 $\pm$ 0.3    | 18 <sup>a</sup> | 21 $\pm$ 0.3    | 13 $\pm$ 0.3    | 19 <sup>a</sup> | 28 $\pm$ 0.5    | 31 $\pm$ 0.1    | 20 $\pm$ 0.5    | 0 <sup>a</sup> |
| <i>Cryptococcus</i> var. <i>grubii</i> H99 serotype A | 13 $\pm$ 0.3    | 21 <sup>a</sup> | 28 $\pm$ 0.2    | 15 $\pm$ 0.1    | 20 $\pm$ 0.3    | 27 $\pm$ 0.1    | 15 <sup>a</sup> | 18 $\pm$ 0.2    | 23 <sup>a</sup> | 15 $\pm$ 0.3    | 26 <sup>a</sup> | 30 <sup>a</sup> | 35 $\pm$ 0.2    | 24 <sup>a</sup> | 0 <sup>a</sup> |

<sup>a</sup> SD < 0.05.

**Table S2**

Amount (expressed as  $\mu\text{g/mL}$ ) of punicalagin (PG), punicalin (PA) and ellagic acid (EA) in the lysates of *Candida albicans* strains at different incubation times.

| Time (h) | <i>C. albicans</i> SC5314 |                 |                   |           |                 |                   | <i>C. albicans</i> 1 |                 |                   |           |                 |                   |
|----------|---------------------------|-----------------|-------------------|-----------|-----------------|-------------------|----------------------|-----------------|-------------------|-----------|-----------------|-------------------|
|          | Punicalagin               |                 |                   | Punicalin |                 |                   | Punicalagin          |                 |                   | Punicalin |                 |                   |
|          | PG                        | PA              | EA                | PG        | PA              | EA                | PG                   | PA              | EA                | PG        | PA              | EA                |
| 12       | 0.72 $\pm$ 0.11           | 0.05 $\pm$ 0.02 | 0.02 <sup>a</sup> | n.d.      | 1.55 $\pm$ 0.04 | 0.02 <sup>a</sup> | 0.33 $\pm$ 0.08      | 0.06 $\pm$ 0.01 | 0.03 <sup>a</sup> | n.d.      | 1.28 $\pm$ 0.05 | 0.02 <sup>a</sup> |
| 24       | 0.95 $\pm$ 0.02           | 0.10 $\pm$ 0.01 | 0.03 <sup>a</sup> | n.d.      | 1.56 $\pm$ 0.13 | 0.02 <sup>a</sup> | 0.72 $\pm$ 0.02      | 0.09 $\pm$ 0.01 | 0.03 <sup>a</sup> | n.d.      | 1.63 $\pm$ 0.01 | 0.02 <sup>a</sup> |
| 48       | 0.58 $\pm$ 0.02           | 0.09 $\pm$ 0.01 | 0.04 <sup>a</sup> | n.d.      | 0.95 $\pm$ 0.18 | 0.02 <sup>a</sup> | 0.03 <sup>a</sup>    | 0.43 $\pm$ 0.01 | 0.02 <sup>a</sup> | n.d.      | 0.39 $\pm$ 0.02 | 0.02 <sup>a</sup> |
| 72       | 0.62 $\pm$ 0.06           | 0.07 $\pm$ 0.01 | 0.03 <sup>a</sup> | n.d.      | 0.64 $\pm$ 0.09 | 0.01 <sup>a</sup> | 0.50 $\pm$ 0.04      | 0.08 $\pm$ 0.01 | 0.04 <sup>a</sup> | n.d.      | 0.81 $\pm$ 0.05 | 0.01 <sup>a</sup> |

<sup>a</sup> SD < 0.005.
